# Supplementary material
Source: Springer Nature journal article supplement (https://www.springermedizin.de/resource/supplementary/13058_2011_2921_MOESM7_ESM.pdf/9702836)

**MIN****Carcinoma****Whole  
Mount**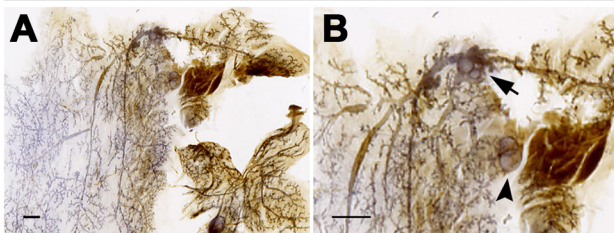**H&E**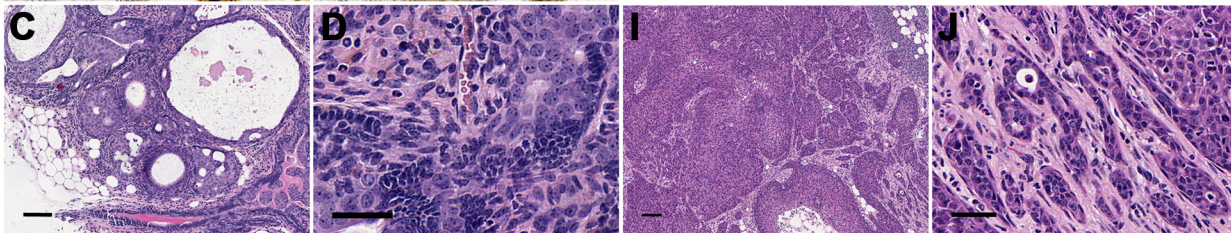**ER $\alpha$** 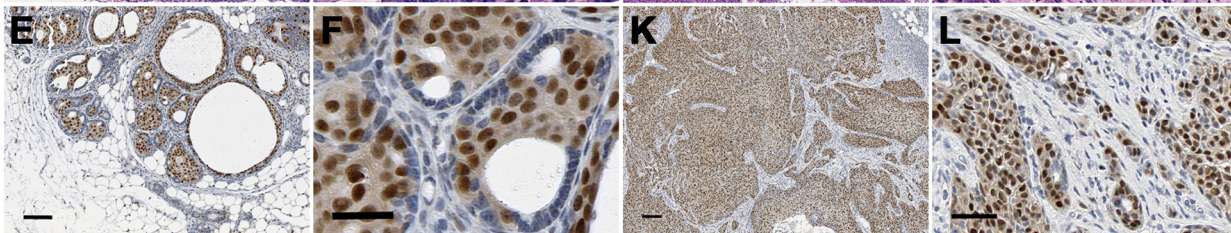**PR**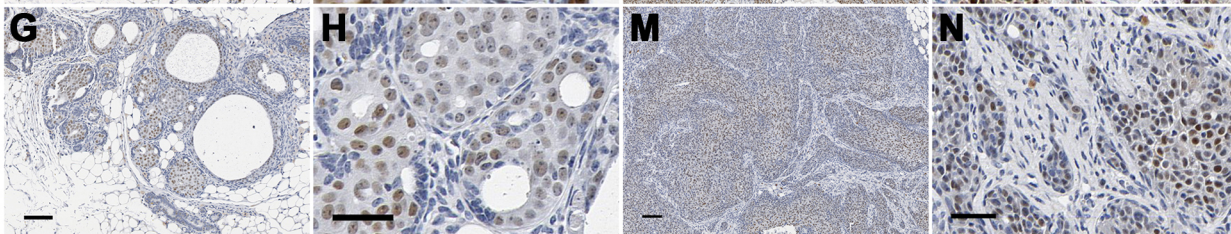

Supplement: MOESM7 [file 9702836]
